# Supplementary material
Source: PubMed Central journal article supplement (PMC4556499)
Supplement: PulmCirc-005-481.s001.pdf [file PulmCirc-005-481.s001.pdf]

## Appendix from Su et al., “Right ventricular protein expression profile in end-stage heart failure” (Pulm. Circ., vol. 5, no. 3, p. 000)

Table S1. Ischemic LV ( $n = 6$ ) versus ischemic RV ( $n = 6$ ) proteomic results

| Cluster, protein           | Gene         | MW, kDa | Unique peptides | Spectral counts | Peptide covered, % | LV/RV AV ratio | <i>P</i> , <i>t</i> test |
|----------------------------|--------------|---------|-----------------|-----------------|--------------------|----------------|--------------------------|
| Cluster 1                  |              |         |                 |                 |                    | 1.41           | 0.012                    |
| Mu-crystallin homolog      | <i>CRYM</i>  | 34      | 1               | 1               | 3                  |                |                          |
| Cluster 2                  |              |         |                 |                 |                    | 1.61           | 0.051                    |
| Tropomyosin 1 alpha        | <i>TPM1</i>  | 33      | 18              | 26              | 41                 |                |                          |
| Mu-crystallin homolog      | <i>CRYM</i>  | 34      | 4               | 4               | 14                 |                |                          |
| Cluster 3                  |              |         |                 |                 |                    | 2.04           | 0.03                     |
| Tropomyosin 1 alpha        | <i>TPM1</i>  | 33      | 19              | 25              | 42                 |                |                          |
| Cluster 4                  |              |         |                 |                 |                    | 2.61           | 0.021                    |
| Thioredoxin-like protein 1 | <i>TXNL1</i> | 32      | 4               | 5               | 17                 |                |                          |
| Cluster 5                  |              |         |                 |                 |                    | 2.75           | 0.019                    |
| Actinin-2 fragment         | <i>ACTN2</i> | 104     | 9               | 10              | 11                 |                |                          |

Note: Unique peptides: no. of peptides unique to the parent protein in question identified by tandem mass spectrometry; spectral counts: no. of spectral counts identified by tandem mass spectrometry; peptide covered: percentage of the entire parent peptide identified by the digested peptide fragments identified by tandem mass spectrometry mapped back to the entire parent peptide. AV: average abundance; LV: left ventricle; MW: molecular weight; RV: right ventricle.

Table S2. Nonischemic LV ( $n = 6$ ) versus nonischemic RV ( $n = 6$ ) proteomic results

| Cluster, protein                                     | Gene         | MW, kDa | Unique peptides | Spectral counts | Peptide covered, % | LV/RV AV ratio | $P$ , $t$ test |
|------------------------------------------------------|--------------|---------|-----------------|-----------------|--------------------|----------------|----------------|
| Cluster 1                                            |              |         |                 |                 |                    | 1.36           | 0.028          |
| Mitochondrial inner membrane protein <sup>a</sup>    | <i>IMMT</i>  | 84      | 29              | 38              | 31                 |                |                |
| Cluster 2                                            |              |         |                 |                 |                    | 1.29           | 0.029          |
| Mu-crystallin homolog                                | <i>CRYM</i>  | 34      | 1               | 1               | 3                  |                |                |
| Cluster 3                                            |              |         |                 |                 |                    | 1.49           | 0.046          |
| Tropomyosin 1 alpha                                  | <i>TPM1</i>  | 33      | 13              | 14              | 41                 |                |                |
| Mu-crystallin homolog                                | <i>CRYM</i>  | 34      | 9               | 12              | 23                 |                |                |
| Clusterin                                            | <i>CLUS</i>  | 52      | 5               | 7               | 13                 |                |                |
| Cluster 4                                            |              |         |                 |                 |                    | 1.43           | 0.026          |
| Tropomyosin 1 alpha                                  | <i>TPM1</i>  | 33      | 19              | 25              | 42                 |                |                |
| Cluster 5                                            |              |         |                 |                 |                    | 1.35           | 0.013          |
| Ubiquinone biosynthesis protein COQ9 (mitochondrial) | <i>COQ9</i>  | 36      | 8               | 9               | 22                 |                |                |
| Cluster 6 <sup>b</sup>                               |              |         |                 |                 |                    | 1.28           | 0.047          |
| ATP synthase subunit d                               | <i>ATP5H</i> | 18      | 18              | 23              | 43                 |                |                |
| Cluster 7                                            |              |         |                 |                 |                    | 1.3            | 0.056          |
| Cathepsin D                                          | <i>CATD</i>  | 45      | 8               | 12              | 14                 |                |                |
| Prohibitin                                           | <i>PHB</i>   | 30      | 8               | 10              | 29                 |                |                |

Note: Unique peptides: no. of peptides unique to the parent protein in question identified by tandem mass spectrometry; spectral counts: no. of spectral counts identified by tandem mass spectrometry; peptide covered: percentage of the entire parent peptide identified by the digested peptide fragments identified by tandem mass spectrometry mapped back to the entire parent peptide. AV: average abundance; LV: left ventricle; MW: molecular weight; RV: right ventricle.

<sup>a</sup> Mitofilin, p87/89, cell proliferation-inducing gene 4 protein.

<sup>b</sup> Also some background from myosin light chain 3 (*MYL3*).

Table S3. Paired LV ( $n = 8$ ) versus RV dysfunction ( $n = 8$ ) proteomic results

| Cluster, protein                                     | Gene         | MW, kDa | Unique peptides | Spectral counts | Peptide covered, % | Unpaired       |                  | Paired         |                  |
|------------------------------------------------------|--------------|---------|-----------------|-----------------|--------------------|----------------|------------------|----------------|------------------|
|                                                      |              |         |                 |                 |                    | LV/RV AV ratio | P, <i>t</i> test | LV/RV AV ratio | P, <i>t</i> test |
| Cluster 1                                            |              |         |                 |                 |                    | 1.3            | 0.01             | 1.34           | 0.026            |
| Mu-crystallin homolog                                | <i>CRYM</i>  | 34      | 1               | 1               | 3                  |                |                  |                |                  |
| Cluster 2                                            |              |         |                 |                 |                    | NS             | NS               | 1.37           | 0.04             |
| Tropomyosin 1 alpha                                  | <i>TPM1</i>  | 33      | 19              | 25              | 42                 |                |                  |                |                  |
| Cluster 3                                            |              |         |                 |                 |                    | 1.31           | 0.035            | 1.35           | 0.012            |
| Ubiquinone biosynthesis protein COQ9 (mitochondrial) | <i>COQ9</i>  | 36      | 8               | 9               | 22                 |                |                  |                |                  |
| Cluster 4 <sup>a</sup>                               |              |         |                 |                 |                    | NS             | NS               | 1.23           | 0.017            |
| Troponin I                                           | <i>TNNI3</i> | 24      | 8               | 13              | 32                 |                |                  |                |                  |
| Serum amyloid P-component                            | <i>SAMP</i>  | 25      | 7               | 13              | 28                 |                |                  |                |                  |
| ER protein 29                                        | <i>ERP29</i> | 29      | 6               | 11              | 27                 |                |                  |                |                  |
| Cluster 5                                            |              |         |                 |                 |                    | 1.81           | 0.022            | 1.88           | 0.023            |
| Actinin-2 fragment                                   | <i>ACTN2</i> | 104     | 9               | 10              | 11                 |                |                  |                |                  |

Note: Unique peptides: no. of peptides unique to the parent protein in question identified by tandem mass spectrometry; spectral counts: no. of spectral counts identified by tandem mass spectrometry; peptide covered: percentage of the entire parent peptide identified by the digested peptide fragments identified by tandem mass spectrometry mapped back to the entire parent peptide. AV: average abundance; LV: left ventricle; MW: molecular weight; NS: not significant; RV: right ventricle.

<sup>a</sup> Also weaker evidence for heat-shock protein 27 (*HSP27*) and NADH dehydrogenase (ubiquinone) iron-sulfur protein 3, mitochondrial (*NDUFS3*).

Table S4. Paired LV ( $n = 4$ ) versus RV no dysfunction ( $n = 4$ ) proteomic results

| Cluster, protein                                     | Gene          | MW, kDa | Unique peptides | Spectral counts | Peptide covered, % | Unpaired       |                          | Paired         |                          |
|------------------------------------------------------|---------------|---------|-----------------|-----------------|--------------------|----------------|--------------------------|----------------|--------------------------|
|                                                      |               |         |                 |                 |                    | LV/RV AV ratio | <i>P</i> , <i>t</i> test | LV/RV AV ratio | <i>P</i> , <i>t</i> test |
| Cluster 1                                            |               |         |                 |                 |                    | NS             | NS                       | 1.37           | 0.011                    |
| Transferrin                                          | <i>TRFE</i>   | 77      | 17              | 27              | 21                 |                |                          |                |                          |
| Cluster 2 <sup>a</sup>                               |               |         |                 |                 |                    | 1.47           | 0.047                    | 1.49           | 0.046                    |
| Myosin 7                                             | <i>MYH7</i>   | 223     | 15              | 19              | 7                  |                |                          |                |                          |
| RuvB-like 2                                          | <i>RUVB2</i>  | 51      | 14              | 19              | 28                 |                |                          |                |                          |
| Fibrin(ogen) gamma                                   | <i>FIBG</i>   | 52      | 10              | 13              | 18                 |                |                          |                |                          |
| Cluster 3                                            |               |         |                 |                 |                    | 1.47           | 0.036                    | NS             | NS                       |
| Mu-crystallin homolog                                | <i>CRYM</i>   | 34      | 1               | 1               | 3                  |                |                          |                |                          |
| Cluster 4                                            |               |         |                 |                 |                    | 1.55           | 0.042                    | NS             | NS                       |
| Tropomyosin 1 alpha                                  | <i>TPM1</i>   | 33      | 18              | 26              | 41                 |                |                          |                |                          |
| Mu-crystallin homolog                                | <i>CRYM</i>   | 34      | 4               | 4               | 14                 |                |                          |                |                          |
| Cluster 5 <sup>b</sup>                               |               |         |                 |                 |                    | 1.36           | 0.048                    | NS             | NS                       |
| WDR44                                                | <i>B7Z964</i> | 37      | 23              | 34              | 49                 |                |                          |                |                          |
| Desmin                                               | <i>DES</i>    | 54      | 8               | 9               | 19                 |                |                          |                |                          |
| Cluster 6                                            |               |         |                 |                 |                    | 2.68           | 0.014                    | 2.61           | 0.024                    |
| Tropomyosin 1 alpha                                  | <i>TPM1</i>   | 33      | 19              | 25              | 42                 |                |                          |                |                          |
| Cluster 7                                            |               |         |                 |                 |                    | 1.42           | 0.018                    | 1.41           | 0.0012                   |
| Ubiquinone biosynthesis protein COQ9 (mitochondrial) | <i>COQ9</i>   | 36      | 8               | 9               | 22                 |                |                          |                |                          |
| Cluster 8 <sup>c</sup>                               |               |         |                 |                 |                    | NS             | NS                       | 1.77           | 0.0067                   |
| Troponin I                                           | <i>TNNI3</i>  | 24      | 7               | 10              | 28                 |                |                          |                |                          |
| Serum amyloid P-component                            | <i>SAMP</i>   | 25      | 6               | 10              | 26                 |                |                          |                |                          |

Note: Unique peptides: no. of peptides unique to the parent protein in question identified by tandem mass spectrometry; spectral counts: no. of spectral counts identified by tandem mass spectrometry; peptide covered: percentage of the entire parent peptide identified by the digested peptide fragments identified by tandem mass spectrometry mapped back to the entire parent peptide. AV: average abundance; LV: left ventricle; MW: molecular weight; NS: not significant; RV: right ventricle.

<sup>a</sup> Also weaker evidence for desmin (*DES*).

<sup>b</sup> Also weaker evidence for heme oxygenase 2 (*HMOX2*), lactate dehydrogenase B (*LDHB*), and pyruvate dehydrogenase  $\beta$  (*PDHB*).

<sup>c</sup> Also heat-shock protein 27 (*HSP27*).
